# Supplementary material
Source: PubMed Central journal article supplement (PMC3716323)
Supplement: supp_mol.113.085555_MOLPHARM2013085555SchneiderAguirreTable1S.pdf [file supp_mol.113.085555_MOLPHARM2013085555SchneiderAguirreTable1S.pdf]

**Inflammatory Mediators Increase SUMOylation of RXR $\alpha$  in a JNK-Dependent Manner in  
Human Hepatocellular Carcinoma Cells**

**Rebecca Schneider Aguirre and Saul J. Karpen**

**Molecular Pharmacology**

Table 1s: Quantitative Real-Time PCR Primers.

| <b><u>Gene</u></b> | <b><u>Forward Primer</u></b> | <b><u>Reverse Primer</u></b> |
|--------------------|------------------------------|------------------------------|
| 18s                | 5'-CGGCTACCACATCCAAGGA       | 5'-CCAATTACAGGGCCTCGAAA      |
| BSEP               | 5'-GGGCCATTGTACGAGATCCTAA    | 5'-TGCACCGTCTTTTCACTTTCTG    |
| SHP                | 5'-AACTGCCAGACAGACCCAG       | 5'-AAGGACTCCAGACAGCATTGAAG   |
| GAPDH              | 5'-CGGAGTCAACGGATTTGGTCGTAT  | 5'-AGCCTTCTCCATGGTGGTGAAGAC  |
| MDR1               | 5'-GCCAAAGCCAAAATATCAGC      | 5'-TTCCAATGTGTTCCGGCATT      |
| CYP2B6             | 5'-TTCCTACTGCTTCCGTCTATCAA   | 5'-GTGCAGAATCCCACAGGTCA      |
| F-RXR $\alpha$     | 5'-GGGGTTCTCATCATCATC        | 5'-CTTGTCATCGTCGTCTTGTAGTC   |
| hOST $\beta$       | 5'-GGTGGTCATTATAAGCATGGTCCT  | 5'-CTGGTGGCTGCATCGTTTCT      |
| NTCP               | 5'-GGGACATGAACCTCAGCATT      | 5'-CGTTTGGATTTGAGGACGAT      |
| CYP3A              | 5'-CCAAGCTATGCTCTTCACCG      | 5'-TCAGGCTCCACTTACGGTGC      |
| MRP3               | 5'-TCATCCTGGCGATCTACTTCT     | 5'-CCGTTGAGTGGAATCAGCAA      |
